# Supplementary material for: MDM4/HIPK2/p53 cytoplasmic assembly uncovers coordinated repression of molecules with anti-apoptotic activity during early DNA damage response
Source: PubMed Central journal article supplement — Oncogene. 2015 May 11;35(2):228–40. doi: 10.1038/onc.2015.76 (PMC4717155; doi:10.1038/onc.2015.76), 2015-05-11
Supplement: onc201576x1.pdf [file onc201576x1.pdf]

**MDM4/HIPK2/p53 cytoplasmic assembly uncovers coordinated repression of molecules with anti-apoptotic activity during early DNA damage response**

Mancini et al.,

Supplementary Information includes 7 Figures, 6 Tables.

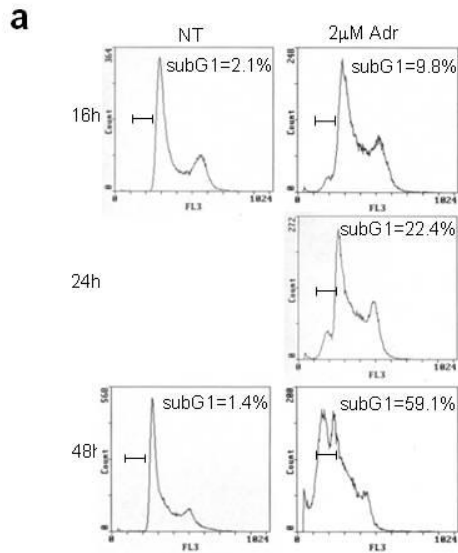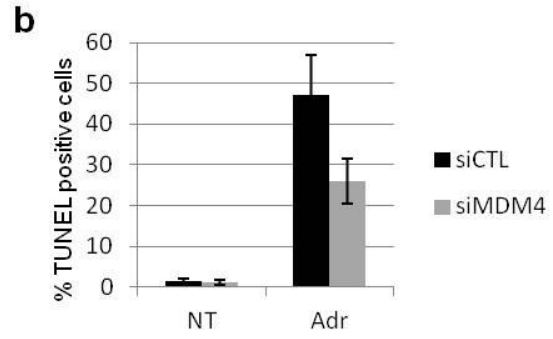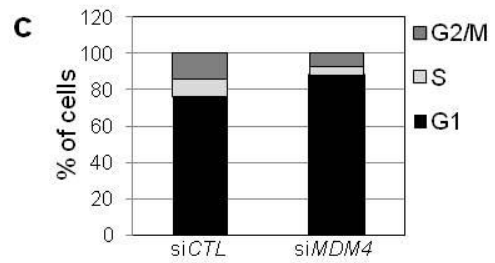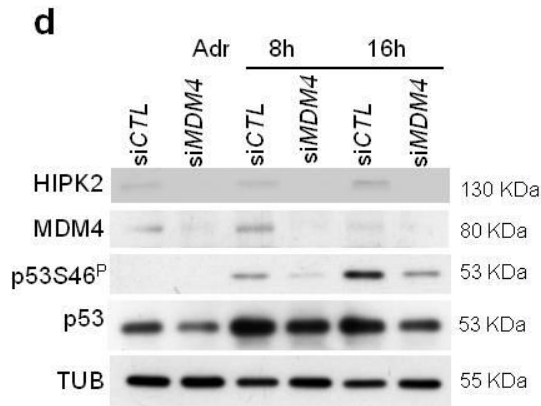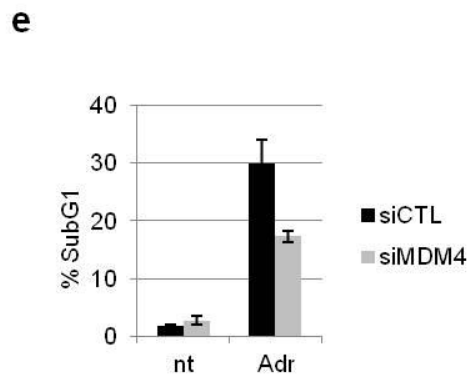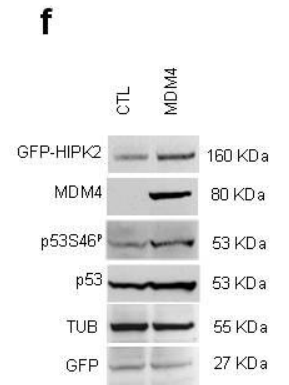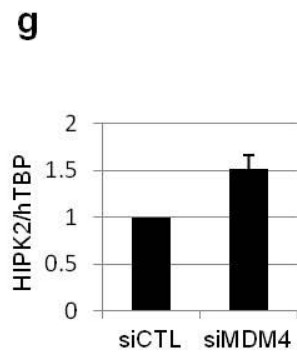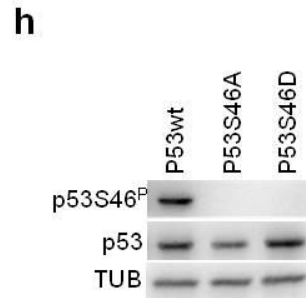

**Figure S1. Analysis of MDM4 activity.** (a) FACS analysis of MCF10A cells untreated (NT) or treated with 2 $\mu$ M Adr at the indicated time points. Line indicates the subG1 area used to quantify % of cell death. (b) Analysis of TUNEL positivity of MCF10A cells transfected with stealth MDM4-specific (siMDM4) or stealth control (siCTL) RNA and untreated (NT) or treated with 2 $\mu$ M Adr for 16 hours. Mean $\pm$ SD of two independent experiments are shown. (c) Distribution of untreated siCTL-MCF10A and siMDM4-MCF10A cells in G1, S and G2/M phases by PI flow cytometry (d) Western blot of indicated proteins in HMEC cells transfected with stealth MDM4-specific (siMDM4) or stealth control (siCTL) RNA and treated with 3.5 $\mu$ M Adr for indicated time points. (e) FACS analysis of HMEC cells transfected as in (a) and treated with 3.5 $\mu$ M Adr for 48 hours. Percentage of cells in subG1 is reported. Mean $\pm$ SD of two independent experiments are shown. (f) WB of the indicated proteins in H1299 transfected with GFP-HIPK2, p53 and CTL or MDM4 expressing vectors. (g) RT-qPCR of HIPK2 mRNA, normalized to hTBP, in the MCF10A transfected as indicated. Mean $\pm$ SD of four independent experiments are shown. (h) WB analysis of indicated proteins in Mdm4<sup>-/-</sup>p53<sup>-/-</sup>MEFs transfected with indicated plasmids.

**a**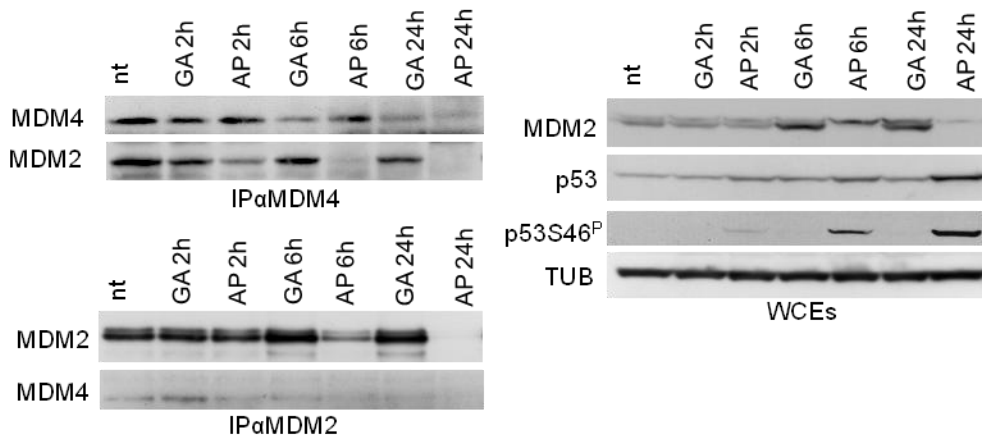**b**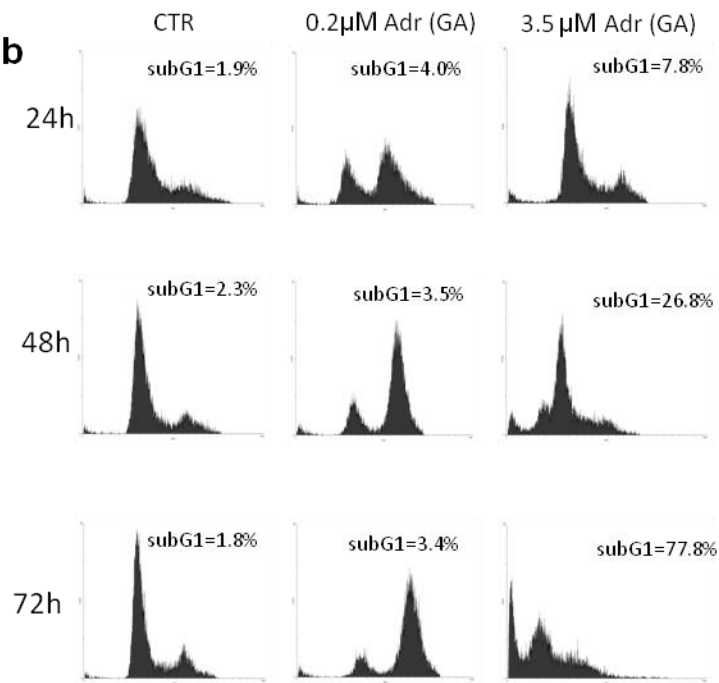**c**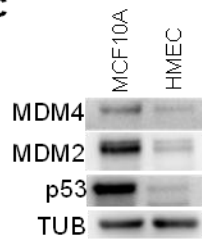**d**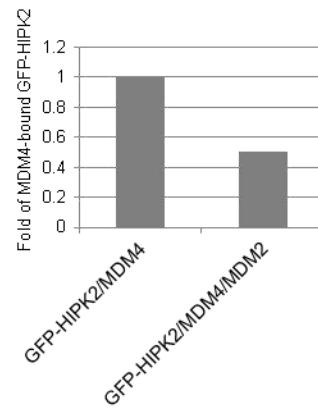

**Figure S2. Analysis of MDM4/MDM2 interaction in HMEC cells.** (a) Western blot of the indicated proteins in HMEC cells untreated (nt) or treated with Adr 0.2 $\mu$ M (GA) and 3.5 $\mu$ M (AP) at the indicated time points. (b) FACS analysis of HMEC cells treated as in (a) at the indicated time points. Percentage of cells in subG1 area is shown. (c) Western blot of the indicated proteins in MCF10A and HMEC cells. (d) Densitometric analysis of GFP-HIPK2 levels in complex with MDM4 as resulting from Figure 4c. The levels of GFP-HIPK2 in the complex with MDM4 were normalized to the levels of MDM4 in the immunoprecipitation and to the levels of GFP-HIPK2 in the WCEs.

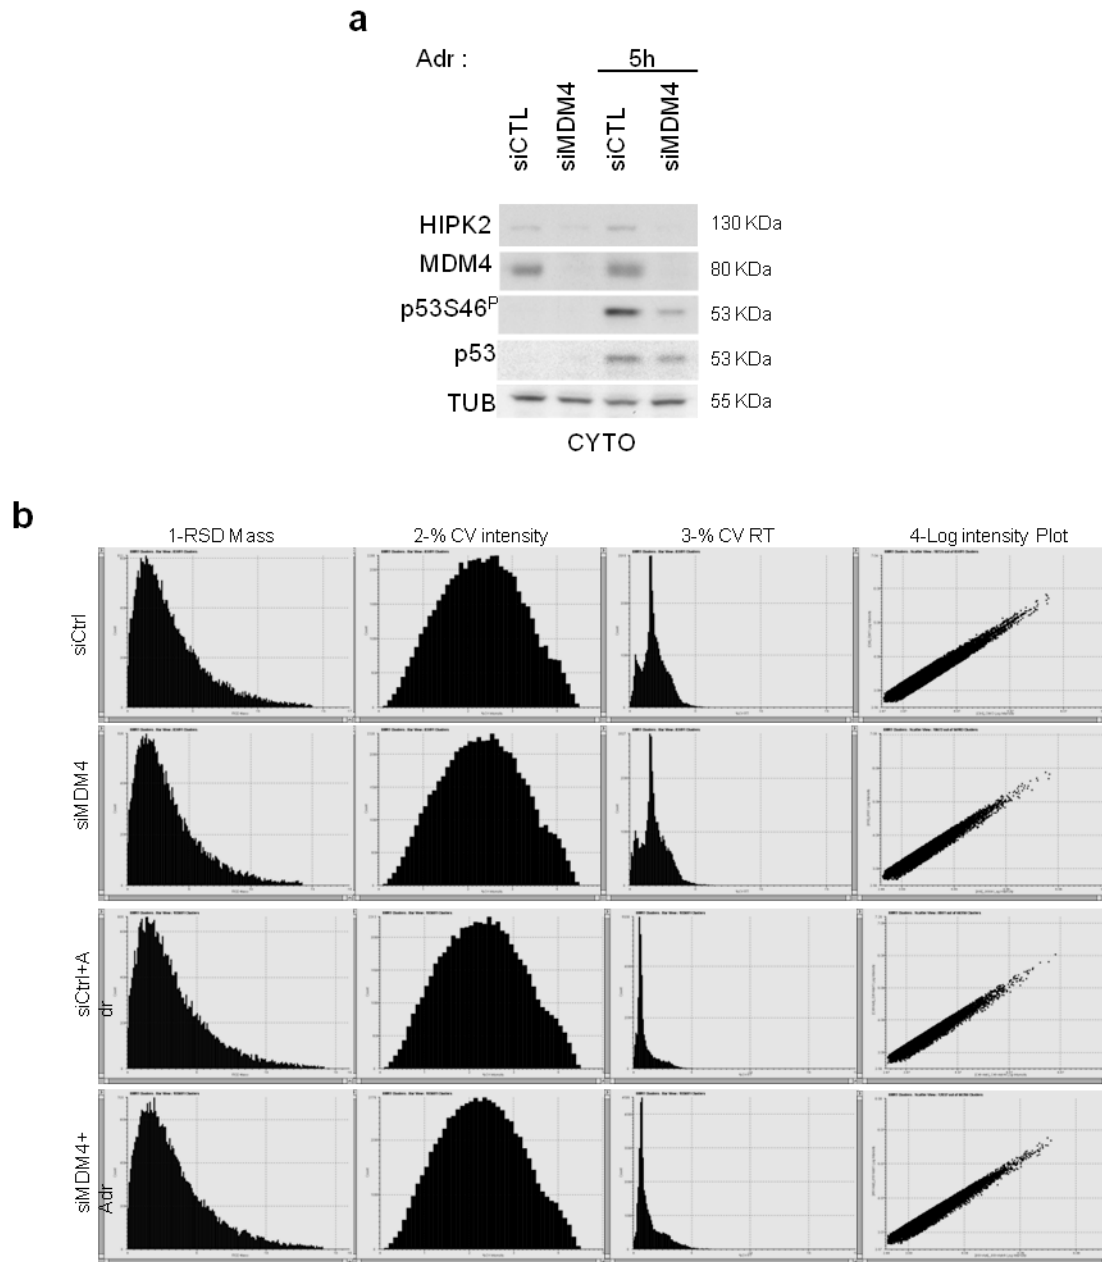

**Figure S3. Proteomic analysis.** (a) Western blot of a fraction of cytoplasmic extracts (CYTO) used for proteomic analysis. siCTL-MCF10A and siMDM4-MCF10A cells were untreated or treated with 2 $\mu$ M Adr for 5 hrs. (b) Analytical reproducibility of replicates from LC-MSE measurements in the four groups: siCTL, siMDM4, siCTL+Adr, siMDM4+Adr. 1: Relative standard deviation of EMRT components within 5 ppm of the mean mass measurements. 2:

Average coefficient of variation of the signal intensity of the clusters. 3: Average retention time coefficient of variation. 4: Binary comparison of the log intensity measurements obtained from the matched EMRT cluster for two replicate injections.

**a**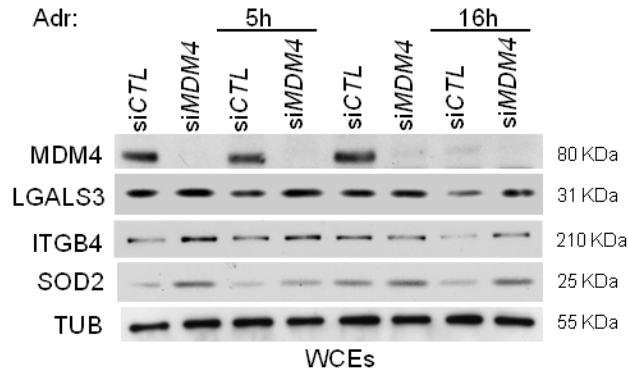**b**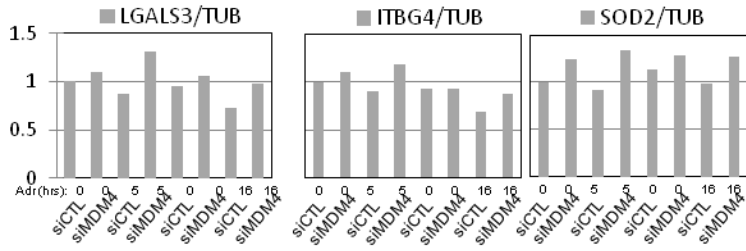**c**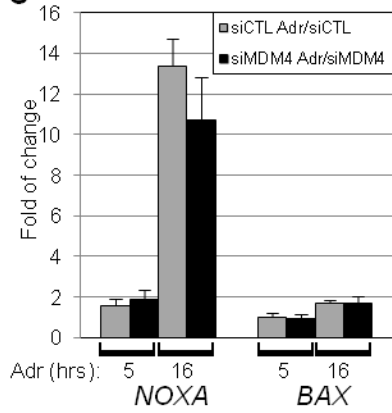**d**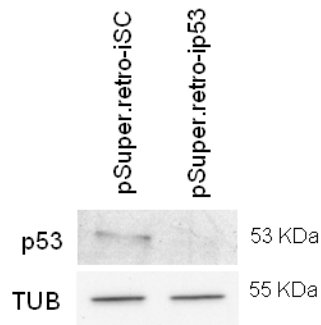**e**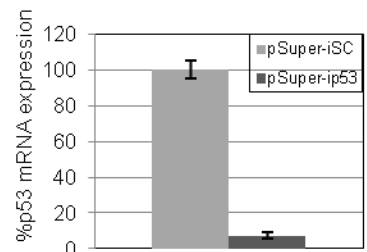



**Figure S4. Validation of proteomic analysis.** (a) WB of whole cell extracts and (b) densitometric analysis of indicated proteins shown in (a). (c) RT-qPCR of indicated mRNAs from MCF10A treated as in (a). Mean $\pm$ SEM of two experiments performed in triplicates are shown (d) WB and (e) RT-qPCR analysis of p53 in pSuper.retro-iSCMCF10A and pSuper.retro-ip53MCF10A cells. p53 mRNA expression was normalized to hTBP. The pSuper.retro-iSCMCF10A p53 value was arbitrarily set to 100%.

**a**

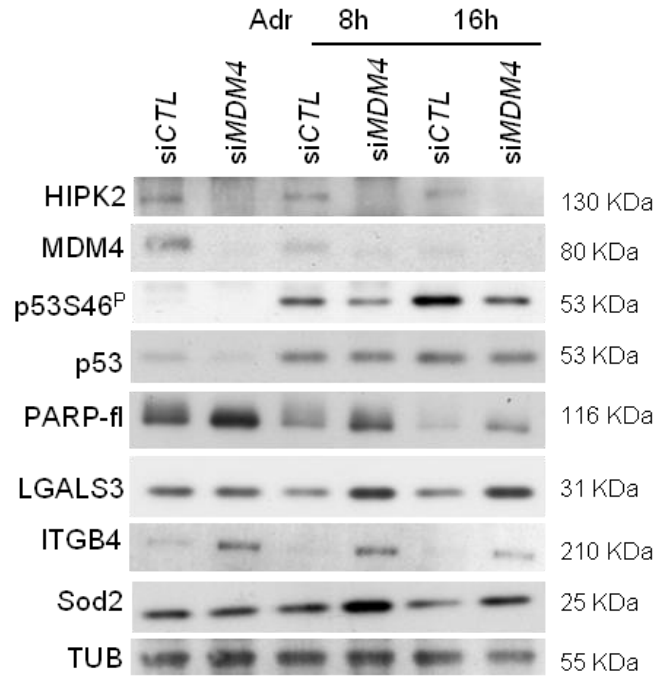

**b**

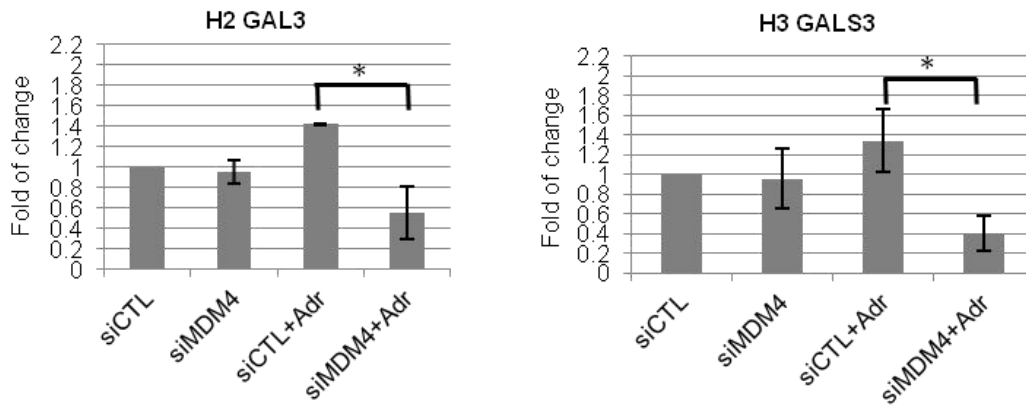

**Figure S5. Analysis of MDM4 interference in HCT116.** (a) WB of the indicated proteins in HCT116 cells transfected with stealth MDM4-specific (siMDM4) or stealth control (siCTL) and treated with 2 $\mu$ M Adr for indicated time points. (b) ChIP analysis of p53 on *LGALS3* promoter in HCT116 cells transfected and treated as in (a). Specific p53 binding on *LGALS3* promoter was performed using two different set of primers (H2Gal3 and H3Gal3). (N=3; \* = p<0.05 Student's t-test).

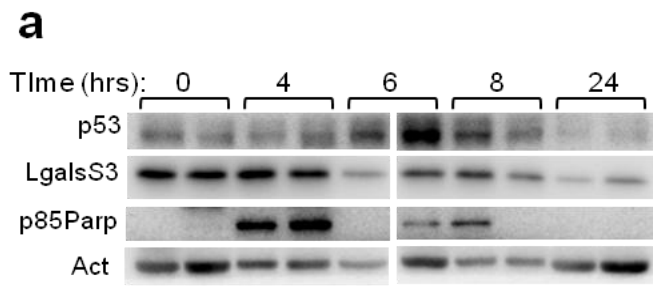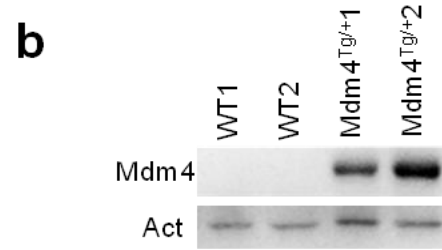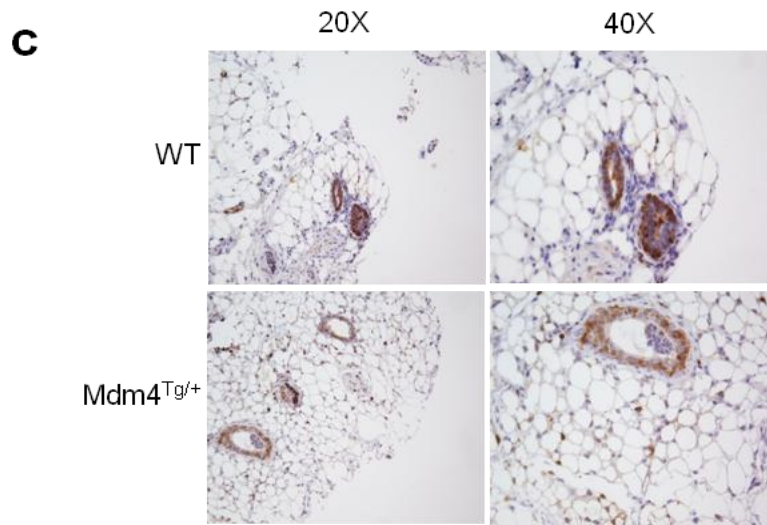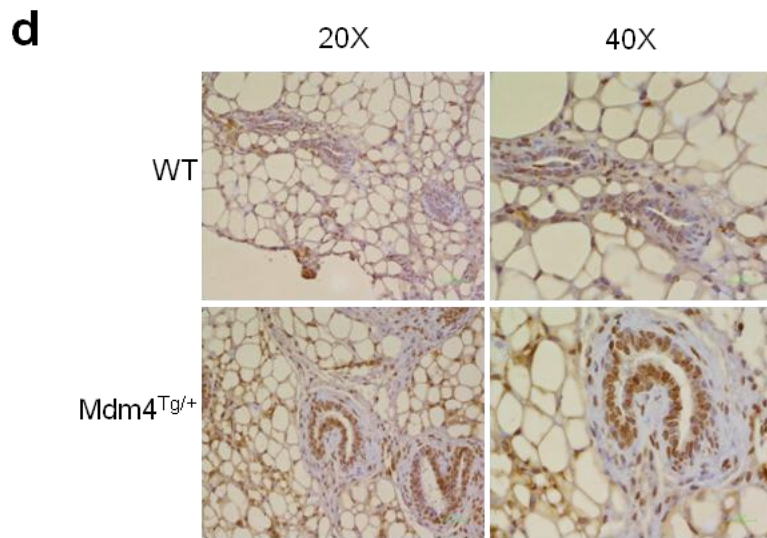

**Figure S6. Analysis of mouse mammary fat pad (MFP) samples.** (a) WB of indicated proteins in MFP samples of C57Bl6 mice undergone to  $\gamma$ -irradiation and analysed at the indicated time points. Two animals were sacrificed at each indicated time point (b) WB of indicated proteins in MFP samples of 2 age-matched control (WT) and 2 *Mdm4* overexpressing transgenic female mice ( $Mdm4^{Tg/+}$ ) (c-d) Analysis of murine Lgals3 (c) and HIPK2 (d) in Formalin-Fixed, Paraffin-Embedded (FFPE) mammary fat pad samples of WT and  $Mdm4^{Tg/+}$  mice sacrificed 6 hrs after 6 Gy  $\gamma$ -irradiation. A representative image for each animal is shown at two different magnifications as indicated (20X and 40X).

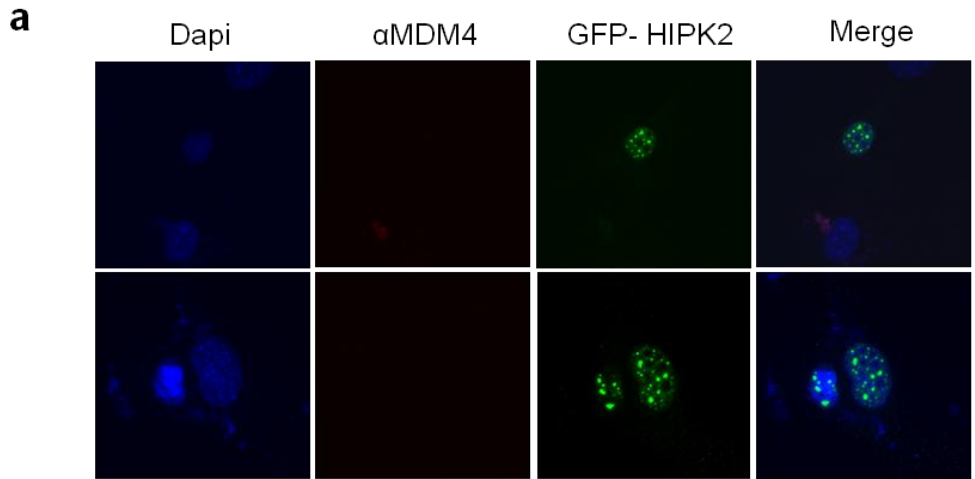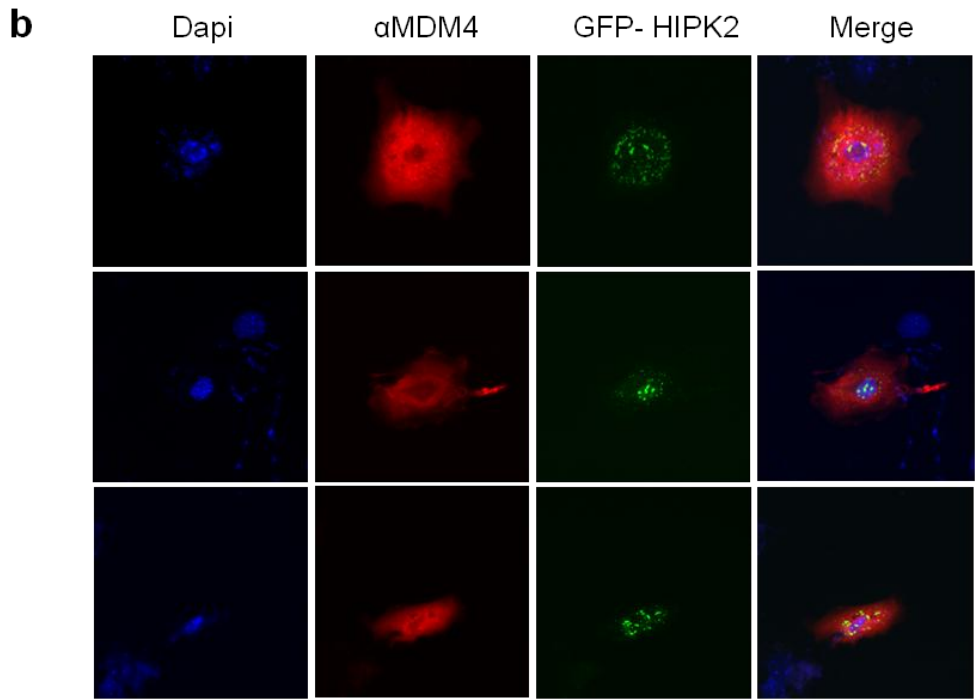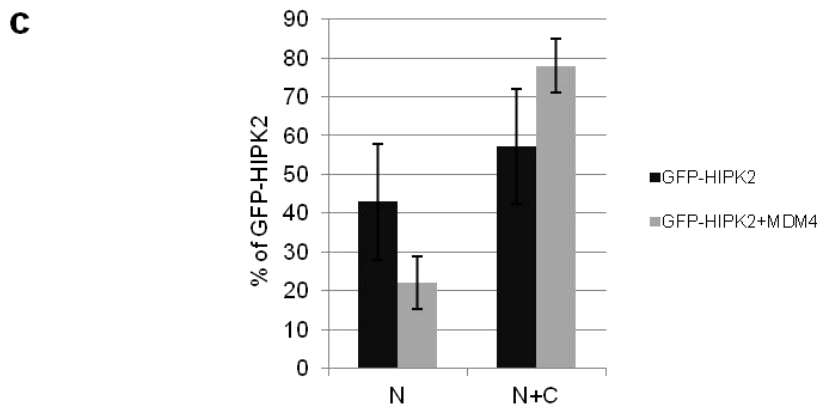

**Figure S7. Localization of HIPK2 in the presence or absence of MDM4. (a-b)** Immunofluorescence of MEFs cells transfected with GFP-HIPK2 (a) or GFP-HIPK2 and pcDNA3.1MDM4 (b). GFP-HIPK2 is shown in green, MDM4 is stained in red. DNA (blue) is stained with DAPI. (c) Percentage of cells showing GFP-HIPK2 localization in the nuclei (N) and in the nuclei+cytoplasm (C+N) Mean $\pm$ SD of three independent experiments are shown.

**Supplementary Table 1. Summary of Shotgun proteomic analyses**

| <b><u>Comparison</u></b>             | <b><u>Downregulated<br/>proteins</u></b> | <b><u>Upregulated<br/>proteins</u></b> |
|--------------------------------------|------------------------------------------|----------------------------------------|
| siMDM4 vs siCTL MCF10A cells         | 22                                       | 20                                     |
| siMDM4+Adr vs siCTL+Adr MCF10A cells | 20                                       | 52                                     |
| siCTL+Adr vs siCTL MCF10A cells      | 50                                       | 21                                     |



## Supplementary Table 2. siMDM4 vs siCTL MCF10A cells

|                                 |                                                                                                                                                                                                                                  |
|---------------------------------|----------------------------------------------------------------------------------------------------------------------------------------------------------------------------------------------------------------------------------|
| <b>Accession *</b>              | Unique protein sequence identifier according to UniProtKB/Swiss-Prot Protein Knowledgebase, release 2011_06 of 31-May-11.                                                                                                        |
| <b>PLGS Score †</b>             | ProteinLynx Global Server score.                                                                                                                                                                                                 |
| <b>Highly represented ‡</b>     | Protein appeared only in the indicated group and found in all three technical replicates.                                                                                                                                        |
| <b>siMDM4/siCTL §</b>           | Ratio of expression between the two experimental groups. An arbitrary ratio value of 0.1 or 10 is attributed to a protein found "highly represented" in the denominator or in the numerator group of the fraction, respectively. |
| <b>Colours Code°</b>            | Green indicates a protein downregulated and Red a protein upregulated. That means green proteins are directly associated to the presence of MDM4, red proteins are inversely associated to MDM4.                                 |
| <b>Symbol, Location, Type #</b> | According to IPA annotation, Build Version 124019/Content version: 11631407 ((Release Date: 2011-09-17).                                                                                                                         |

| Accession* | Description                                                                         | PLGS Score † | Highly Represented ‡ | siMDM4/siCTL §° | Symbol#° | Location #      | Type(s)#    |
|------------|-------------------------------------------------------------------------------------|--------------|----------------------|-----------------|----------|-----------------|-------------|
| P34897     | Serine hydroxymethyltransferase, mitochondrial (SHMT2)                              | 246.58       | siCTL                | 0.10            | SHMT2    | Cytoplasm       | enzyme      |
| Q16629     | Serine/arginine-rich splicing factor 7 (SRSF7)                                      | 142.01       | siCTL                | 0.10            | SRSF7    | Nucleus         | other       |
| P49368     | T-complex protein 1 subunit gamma(CCT3 )                                            | 365.84       | siCTL                | 0.10            | CCT3     | Cytoplasm       | other       |
| Q5XKE5     | Keratin, type II cytoskeletal 79 (KRT79)                                            | 263.79       | siCTL                | 0.10            | KRT79    | Unknown         | other       |
| P08779     | Keratin, type I cytoskeletal 16 (KRT16)                                             | 352.26       | siCTL                | 0.10            | KRT16    | Cytoplasm       | other       |
| P51572     | B-cell receptor-associated protein 31 (BCAP31 )                                     | 206.19       | siCTL                | 0.10            | BCAP31   | Cytoplasm       | transporter |
| P19012     | Keratin, type I cytoskeletal 15 (KRT15)                                             | 311.39       | siCTL                | 0.10            | KRT15    | Cytoplasm       | other       |
| P52597     | Heterogeneous nuclear ribonucleoprotein F (HNRNPF)                                  | 158.79       | siCTL                | 0.10            | HNRNPF   | Nucleus         | other       |
| P08727     | Keratin, type I cytoskeletal 19 (KRT19)                                             | 273.42       | siCTL                | 0.10            | KRT19    | Cytoplasm       | other       |
| P62158     | Calmodulin(CALM1 )                                                                  | 120.12       | siCTL                | 0.10            | CALM1    | Cytoplasm       |             |
| O15533     | Tapasin (TAPBP)                                                                     | 171.41       | siCTL                | 0.10            | TAPBP    | Cytoplasm       |             |
| P39656     | Dolichyl-diphosphooligosaccharide-protein glycosyltransferase 48 kDa subunit(DDOST) | 119.56       | siCTL                | 0.10            | DDOST    | Cytoplasm       | enzyme      |
| O95678     | Keratin, type II cytoskeletal 75 (KRT75)                                            | 351.29       | siCTL                | 0.10            | KRT75    | Cytoplasm       | other       |
| P62873     | Guanine nucleotide-binding protein G(I)/G(S)/G(T) subunit beta-1(GNB1 )             | 216.52       | siCTL                | 0.10            | GNB1     | Plasma Membrane | enzyme      |
| Q04695     | Keratin, type I cytoskeletal 17 (KRT17 )                                            | 524.13       | siCTL                | 0.10            | KRT17    | Cytoplasm       | other       |
| P84103     | Serine/arginine-rich splicing factor 3 (SRSF3 )                                     | 155.36       | siCTL                | 0.10            | SRSF3    | Nucleus         | other       |

|        |                                                           |        |        |       |             |                     |                       |
|--------|-----------------------------------------------------------|--------|--------|-------|-------------|---------------------|-----------------------|
| Q96A08 | Histone H2B type 1-A (HIST1H2BA)                          | 119.08 | siCTL  | 0.10  | HIST1H2BA   | Nucleus             | other                 |
| Q01546 | Keratin, type II cytoskeletal 2 oral (KRT76)              | 300.82 |        | 0.60  | KRT76       | Cytoplasm           | other                 |
| P22626 | Heterogeneous nuclear ribonucleoproteins A2/B1(HNRNPA2B1) | 237.57 |        | 0.63  | HNRNPA2B1   | Nucleus             | other                 |
| P08670 | Vimentin (VIM )                                           | 444.93 |        | 0.66  | VIM         | Cytoplasm           | other                 |
| P04259 | Keratin, type II cytoskeletal 6B (KRT6B)                  | 443.53 |        | 0.69  | KRT6B       | Cytoplasm           | other                 |
| P08195 | 4F2 cell-surface antigen heavy chain (SLC3A2 )            | 791.90 |        | 0.69  | SLC3A2      | Plasma Membrane     | transporter           |
| P31949 | Protein S100-A11 (S100A11)                                | 516.82 |        | 1.35  | S100A11     | Cytoplasm           | other                 |
| A5A3E0 | POTE ankyrin domain family member F (POTEF )              | 750.92 |        | 1.36  | POTEE/POTEF | unknow n            | other                 |
| Q6S8J3 | POTE ankyrin domain family member E (POTEE)               | 778.22 |        | 1.38  | POTEE/POTEF | unknow n            | other                 |
| P07437 | Tubulin beta chain (TUBB)                                 | 360.55 |        | 1.40  | TUBB        | Cytoplasm           | other                 |
| P50454 | Serpin H1 (SERPINH1)                                      | 257.23 |        | 1.49  | SERPINH1    | Extracellular Space | other                 |
| P04179 | Superoxide dismutase [Mn], mitochondrial (SOD2)           | 341.11 |        | 1.93  | SOD2        | Cytoplasm           | enzyme                |
| P08648 | Integrin alpha-5 (ITGA5)                                  | 302.16 |        | 2.44  | ITGA5       | Plasma Membrane     | other                 |
| P08865 | 40S ribosomal protein SA (RPSA)                           | 194.41 | siMDM4 | 10.00 | RPSA        | Cytoplasm           | translation regulator |
| P35221 | Catenin alpha-1 (CTNNA1)                                  | 491.79 | siMDM4 | 10.00 | CTNNA1      | Plasma Membrane     | other                 |
| P55084 | Trifunctional enzyme subunit beta, mitochondrial (HADHB)  | 457.95 | siMDM4 | 10.00 | HADHB       | Cytoplasm           | enzyme                |
| Q9HAV7 | GrpE protein homolog 1, mitochondrial (GRPEL1)            | 198.76 | siMDM4 | 10.00 | GRPEL1      | Cytoplasm           | other                 |
| Q13751 | Laminin subunit beta-3 (LAMB3)                            | 475.82 | siMDM4 | 10.00 | LAMB3       | Extracellular Space | transporter           |
| P04083 | Annexin A1 (ANXA1)                                        | 187.23 | siMDM4 | 10.00 | ANXA1       | Plasma Membrane     | other                 |
| P25398 | 40S ribosomal protein S12 (RPS12 )                        | 151.99 | siMDM4 | 10.00 | RPS12       | Cytoplasm           | other                 |
| O43707 | Alpha-actinin-4 (ACTN4)                                   | 649.75 | siMDM4 | 10.00 | ACTN4       | Cytoplasm           | other                 |
| P68104 | Elongation factor 1-alpha 1 (EEF1A1 )                     | 227.90 | siMDM4 | 10.00 | EEF1A1      | Cytoplasm           | translation regulator |
| Q5VTE0 | Putative elongation factor 1-alpha-like 3 (EEF1A1P5)      | 232.41 | siMDM4 | 10.00 | EEF1AL3     | unknow n            | other                 |
| P30049 | ATP synthase subunit delta, mitochondrial (ATP5D )        | 128.84 | siMDM4 | 10.00 | ATP5D       | Cytoplasm           | transporter           |
| Q16352 | Alpha-internexin (INA)                                    | 220.02 | siMDM4 | 10.00 | INA         | Cytoplasm           | other                 |
| P04264 | Keratin, type II cytoskeletal 1 (KRT1)                    | 370.80 | siMDM4 | 10.00 | KRT1        | Cytoplasm           | other                 |

### Supplementary Table 3. siMDM4+Adr vs siCTL+Adr MCF10A cells

|                                 |                                                                                                                                                                                                                                  |
|---------------------------------|----------------------------------------------------------------------------------------------------------------------------------------------------------------------------------------------------------------------------------|
| <b>Accession *</b>              | Unique protein sequence identifier according to UniProtKB/Swiss-Prot Protein Knowledgebase, release 2011_06 of 31-May-11.                                                                                                        |
| <b>PLGS Score †</b>             | ProteinLynx Global Server score.                                                                                                                                                                                                 |
| <b>Highly represented ‡</b>     | Protein appeared only in the indicated group and found in all three technical replicates.                                                                                                                                        |
| <b>siMDM4/siCTL §</b>           | Ratio of expression between the two experimental groups. An arbitrary ratio value of 0.1 or 10 is attributed to a protein found "highly represented" in the denominator or in the numerator group of the fraction, respectively. |
| <b>Colours Code°</b>            | Green indicates a protein downregulated and Red a protein upregulated. That means green proteins are directly associated to the presence of MDM4, red proteins are inversely associated to MDM4.                                 |
| <b>Symbol, Location, Type #</b> | According to IPA annotation, Build Version 124019/Content version: 11631407 ((Release Date: 2011-09-17).                                                                                                                         |

| Accession* | Description                                                             | PLGS Score † | Highly Represented ‡ | siMDM4+Adr/siCTL+Adr§° | Symbol#° | Location#       | Type(s)#                |
|------------|-------------------------------------------------------------------------|--------------|----------------------|------------------------|----------|-----------------|-------------------------|
| P35232     | Prohibitin (PHB)                                                        | 254.63       | siCTL+<br>Adr        | 0.10                   | PHB      | Nucleus         | transcription regulator |
| P06733     | Alpha-enolase (ENO1 )                                                   | 357.78       | siCTL+<br>Adr        | 0.10                   | ENO1     | Cytoplasm       | transcription regulator |
| Q99623     | Prohibitin-2 (PHB2)                                                     | 260.54       | siCTL+<br>Adr        | 0.10                   | PHB2     | Cytoplasm       | transcription regulator |
| Q13838     | Spliceosome RNA helicase DDX39B (DDX39B)                                | 194.65       | siCTL+<br>Adr        | 0.10                   | DDX39B   | Nucleus         | enzyme                  |
| Q9H0C2     | ADP/ATP translocase 4 (SLC25A31)                                        | 174.63       | siCTL+<br>Adr        | 0.10                   | SLC25A31 | Cytoplasm       | transporter             |
| P11279     | Lysosome-associated membrane glycoprotein 1(LAMP1)                      | 174.49       | siCTL+<br>Adr        | 0.10                   | LAMP1    | Plasma Membrane | other                   |
| P62158     | Calmodulin (CALM1 )                                                     | 203.74       | siCTL+<br>Adr        | 0.10                   | CALM1    | Cytoplasm       |                         |
| P54709     | Sodium/potassium-transporting ATPase subunit beta-3(ATP1B3)             | 97.40        | siCTL+<br>Adr        | 0.10                   | ATP1B3   | Plasma Membrane | transporter             |
| Q14697     | Neutral alpha-glucosidase AB (GANAB)                                    | 392.52       | siCTL+<br>Adr        | 0.10                   | GANAB    | Cytoplasm       | enzyme                  |
| P62879     | Guanine nucleotide-binding protein G(I)/G(S)/G(T) subunit beta-2 (GNB2) | 231.89       | siCTL+<br>Adr        | 0.10                   | GNB2     | Plasma Membrane | enzyme                  |
| P30048     | Thioredoxin-dependent peroxide reductase, mitochondrial (PRDX3 )        | 222.11       | siCTL+<br>Adr        | 0.10                   | PRDX3    | Cytoplasm       | enzyme                  |
| P61026     | Ras-related protein Rab-10 (RAB10)                                      | 167.35       | siCTL+<br>Adr        | 0.10                   | RAB10    | Cytoplasm       | enzyme                  |
| Q00839     | Heterogeneous nuclear ribonucleoprotein U (HNRNPU )                     | 312.99       | siCTL+<br>Adr        | 0.10                   | HNRNPU   | Nucleus         | transporter             |
| O00148     | ATP-dependent RNA helicase DDX39A (DDX39A)                              | 178.69       | siCTL+<br>Adr        | 0.10                   | DDX39A   | Nucleus         | enzyme                  |
| P27824     | Calnexin (CANX )                                                        | 266.82       | siCTL+<br>Adr        | 0.10                   | CANX     | Cytoplasm       | other                   |

|        |                                                                  |         |  |      |           |                     |                         |
|--------|------------------------------------------------------------------|---------|--|------|-----------|---------------------|-------------------------|
| Q9BYX7 | Putative beta-actin-like protein 3 (POTEKP )                     | 332.53  |  | 0.64 | POTEKP    | unknown             | other                   |
| P08195 | 4F2 cell-surface antigen heavy chain (SLC3A2)                    | 971.90  |  | 0.66 | SLC3A2    | Plasma Membrane     | transporter             |
| P33778 | Histone H2B type 1-B (HIST1H2BB)                                 | 218.56  |  | 0.66 | HIST1H2BB | Nucleus             | other                   |
| P27797 | Calreticulin (CALR )                                             | 628.54  |  | 0.72 | CALR      | Cytoplasm           | transcription regulator |
| P63261 | Actin, cytoplasmic 2(ACTG1)                                      | 1640.98 |  | 0.73 | ACTG1     | Cytoplasm           | other                   |
| P07237 | Protein disulfide-isomerase (P4HB)                               | 422.43  |  | 1.38 | P4HB      | Cytoplasm           | enzyme                  |
| P14625 | Endoplasmic (HSP90B1)                                            | 1056.58 |  | 1.40 | HSP90B1   | Cytoplasm           | other                   |
| P09651 | Heterogeneous nuclear ribonucleoprotein A1 (HNRNPA1)             | 245.25  |  | 1.42 | HNRNPA1   | Nucleus             | other                   |
| P06748 | Nucleophosmin (NPM1)                                             | 434.73  |  | 1.46 | NPM1      | Nucleus             | transcription regulator |
| P19338 | Nucleolin (NCL)                                                  | 319.40  |  | 1.46 | NCL       | Nucleus             | other                   |
| P01892 | HLA class I histocompatibility antigen, A-2 alpha chain (HLA-A)  | 317.82  |  | 1.51 | HLA-A     | Plasma Membrane     | transmembrane receptor  |
| P01891 | HLA class I histocompatibility antigen, A-68 alpha chain (HLA-A) | 319.94  |  | 1.51 | HLA-A     | Plasma Membrane     | transmembrane receptor  |
| P10809 | 60 kDa heat shock protein, mitochondrial (HSPD1)                 | 1219.55 |  | 1.52 | HSPD1     | Cytoplasm           | enzyme                  |
| P40926 | Malate dehydrogenase, mitochondrial (MDH2)                       | 530.45  |  | 1.52 | MDH2      | Cytoplasm           | enzyme                  |
| P35613 | Basigin (BSG)                                                    | 298.16  |  | 1.55 | BSG       | Plasma Membrane     | transporter             |
| Q08380 | Galectin-3-binding protein(LGALS3BP)                             | 296.64  |  | 1.62 | LGALS3BP  | Plasma Membrane     | transmembrane receptor  |
| P26006 | Integrin alpha-3 (ITGA3)                                         | 533.38  |  | 1.67 | ITGA3     | Plasma Membrane     | other                   |
| P04259 | Keratin, type II cytoskeletal 6B (KRT6B)                         | 421.37  |  | 1.68 | KRT6B     | Cytoplasm           | other                   |
| P61604 | 10 kDa heat shock protein, mitochondrial (HSPE1)                 | 378.58  |  | 1.68 | HSPE1     | Cytoplasm           | enzyme                  |
| P48668 | Keratin, type II cytoskeletal 6C (KRT6C)                         | 383.20  |  | 1.72 | KRT6C     | unknown             | other                   |
| P38646 | Stress-70 protein, mitochondrial (HSPA9)                         | 1197.09 |  | 1.77 | HSPA9     | Cytoplasm           | other                   |
| P13987 | CD59 glycoprotein (CD59 )                                        | 194.47  |  | 1.79 | CD59      | Plasma Membrane     | other                   |
| P02538 | Keratin, type II cytoskeletal 6A(KRT6A)                          | 389.16  |  | 1.80 | KRT6A     | Plasma Membrane     | other                   |
| Q04837 | Single-stranded DNA-binding protein, mitochondrial (SSBP1)       | 206.71  |  | 1.80 | SSBP1     | Cytoplasm           | other                   |
| P05556 | Integrin beta-1 (ITGB1)                                          | 482.32  |  | 1.84 | ITGB1     | Plasma Membrane     | transmembrane receptor  |
| P30101 | Protein disulfide-isomerase A3 (PDIA3)                           | 749.29  |  | 1.84 | PDIA3     | Cytoplasm           | peptidase               |
| Q9Y6N5 | Sulfide:quinone oxidoreductase, mitochondrial (SQRDL)            | 396.06  |  | 1.99 | SQRDL     | Cytoplasm           | enzyme                  |
| P61769 | Beta-2-microglobulin (B2M)                                       | 282.06  |  | 2.01 | B2M       | Plasma Membrane     | transmembrane receptor  |
| Q8NBS9 | Thioredoxin domain-containing protein 5 (TXNDC5)                 | 255.48  |  | 2.10 | TXNDC5    | Cytoplasm           | enzyme                  |
| P09382 | Galectin-1 (LGALS1)                                              | 477.23  |  | 2.10 | LGALS1    | Extracellular Space | other                   |

|        |                                                                                                                          |        |             |       |             |                     |                         |
|--------|--------------------------------------------------------------------------------------------------------------------------|--------|-------------|-------|-------------|---------------------|-------------------------|
| Q5VTE0 | Putative elongation factor 1-alpha-like 3 (EEF1A1P5)                                                                     | 266.91 |             | 2.23  | EEF1AL3*    | unknown             | other                   |
| Q9HCY8 | Protein S100-A14 (S100A14)                                                                                               | 262.18 |             | 2.39  | S100A14     | Cytoplasm           | other                   |
| A5A3E0 | POTE ankyrin domain family member F O(POTEF)                                                                             | 676.94 |             | 2.64  | POTEE/POTEF | unknown             | other                   |
| Q6S8J3 | POTE ankyrin domain family member E (POTEE)                                                                              | 700.81 |             | 2.66  | POTEE/POTEF | unknown             | other                   |
| P04179 | Superoxide dismutase [Mn], mitochondrial (SOD2)                                                                          | 188.75 |             | 3.74  | SOD2        | Cytoplasm           | enzyme                  |
| P31949 | Protein S100-A11 (S100A11)                                                                                               | 147.95 |             | 3.86  | S100A11     | Cytoplasm           | other                   |
| P06753 | Tropomyosin alpha-3 chain (TPM3)                                                                                         | 252.92 | siMDM4 +Adr | 10.00 | TPM3        | Cytoplasm           | other                   |
| Q96AE4 | Far upstream element-binding protein 1 (FUBP1)                                                                           | 361.72 | siMDM4 +Adr | 10.00 | FUBP1       | Nucleus             | transcription regulator |
| P60174 | Triosephosphate isomerase (TPI1)                                                                                         | 206.04 | siMDM4 +Adr | 10.00 | TPI1        | Cytoplasm           | enzyme                  |
| Q9HAV7 | GrpE protein homolog 1, mitochondrial (GRPEL1)                                                                           | 188.49 | siMDM4 +Adr | 10.00 | GRPEL1      | Cytoplasm           | other                   |
| P36957 | Dihydropyridyllysine-residue succinyltransferase component of 2-oxoglutarate dehydrogenase complex, mitochondrial (DLST) | 230.70 | siMDM4 +Adr | 10.00 | DLST        | Cytoplasm           | enzyme                  |
| P15153 | Ras-related C3 botulinum toxin substrate 2 (RAC2)                                                                        | 160.46 | siMDM4 +Adr | 10.00 | RAC2        | Cytoplasm           | enzyme                  |
| Q13753 | Laminin subunit gamma-2 (LAMC2)                                                                                          | 639.87 | siMDM4 +Adr | 10.00 | LAMC2       | Extracellular Space | other                   |
| P04083 | Annexin A1 (ANXA1)                                                                                                       | 293.03 | siMDM4 +Adr | 10.00 | ANXA1       | Plasma Membrane     | other                   |
| Q9NSB2 | Keratin, type II cuticular Hb4 (KRT84)                                                                                   | 380.86 | siMDM4 +Adr | 10.00 | KRT84       | Cytoplasm           | other                   |
| P16144 | Integrin beta-4 (ITGB4)                                                                                                  | 780.89 | siMDM4 +Adr | 10.00 | ITGB4       | Plasma Membrane     | transmembrane receptor  |
| P08670 | Vimentin (VIM)                                                                                                           | 319.24 | siMDM4 +Adr | 10.00 | VIM         | Cytoplasm           | other                   |
| O95678 | Keratin, type II cytoskeletal 75 (KRT75)                                                                                 | 295.74 | siMDM4 +Adr | 10.00 | KRT75       | Cytoplasm           | other                   |
| P47914 | 60S ribosomal protein L29 (RPL29)                                                                                        | 135.97 | siMDM4 +Adr | 10.00 | RPL29       | Cytoplasm           | other                   |
| P46782 | 40S ribosomal protein S5 (RPS5)                                                                                          | 125.83 | siMDM4 +Adr | 10.00 | RPS5        | Cytoplasm           | other                   |
| Q8N1N4 | Keratin, type II cytoskeletal 78 (KRT78)                                                                                 | 312.51 | siMDM4 +Adr | 10.00 | KRT78       | unknown             | other                   |
| P17931 | Galectin-3 (LGALS3)                                                                                                      | 165.35 | siMDM4 +Adr | 10.00 | LGALS3      | Extracellular Space | other                   |
| P26038 | Moesin (MSN)                                                                                                             | 518.77 | siMDM4 +Adr | 10.00 | MSN         | Plasma Membrane     | other                   |
| P05787 | Keratin, type II cytoskeletal 8 (KRT8)                                                                                   | 253.07 | siMDM4 +Adr | 10.00 | KRT8        | Cytoplasm           | other                   |
| P13647 | Keratin, type II cytoskeletal 5(KRT5)                                                                                    | 274.68 | siMDM4 +Adr | 10.00 | KRT5        | Cytoplasm           | other                   |
| P14314 | Glucosidase 2 subunit beta (PRKCSH)                                                                                      | 415.90 | siMDM4 +Adr | 10.00 | PRKCSH      | Cytoplasm           | enzyme                  |
| P09972 | Fructose-bisphosphate aldolase C (ALDOC)                                                                                 | 274.36 | siMDM4 +Adr | 10.00 | ALDOC       | Cytoplasm           | enzyme                  |

## Supplementary Table 4. siCTL+Adr vs siCTL MCF10A cells

|                                 |                                                                                                                                                                                                                                  |
|---------------------------------|----------------------------------------------------------------------------------------------------------------------------------------------------------------------------------------------------------------------------------|
| <b>Accession *</b>              | Unique protein sequence identifier according to UniProtKB/Swiss-Prot Protein Knowledgebase, release 2011_06 of 31-May-11.                                                                                                        |
| <b>PLGS Score †</b>             | ProteinLynx Global Server score.                                                                                                                                                                                                 |
| <b>Highly represented ‡</b>     | Protein appeared only in the indicated group and found in all three technical replicates.                                                                                                                                        |
| <b>siMDM4/siCTL §</b>           | Ratio of expression between the two experimental groups. An arbitrary ratio value of 0.1 or 10 is attributed to a protein found “highly represented” in the denominator or in the numerator group of the fraction, respectively. |
| <b>Colours Code°</b>            | Green indicates a protein downregulated and Red a protein upregulated. That means green proteins are directly associated to the presence of MDM4, red proteins are inversely associated to MDM4.                                 |
| <b>Symbol, Location, Type #</b> | According to IPA annotation, Build Version 124019/Content version: 11631407 ((Release Date: 2011-09-17).                                                                                                                         |

| Accession* | Description                                                | PLGS Score † | Highly Represented ‡ | siCTL+Adr/siCTL § | Symbol#°  | Location#           | Type(s)#               |
|------------|------------------------------------------------------------|--------------|----------------------|-------------------|-----------|---------------------|------------------------|
| P34897     | Serine hydroxymethyltransferase, mitochondrial (SHMT2 )    | 246.58       | siCTL                | 0.1               | SHMT2     | Cytoplasm           | enzyme                 |
| P20674     | Cytochrome c oxidase subunit 5A, mitochondrial (COX5A)     | 153.2        | siCTL                | 0.1               | COX5A     | Cytoplasm           | enzyme                 |
| Q16629     | Serine/arginine-rich splicing factor 7 (SRSF7)             | 142.01       | siCTL                | 0.1               | SRSF7     | Nucleus             | other                  |
| P49368     | T-complex protein 1 subunit gamma(CCT3)                    | 365.84       | siCTL                | 0.1               | CCT3      | Cytoplasm           | other                  |
| Q5XKE5     | Keratin, type II cytoskeletal 79 (KRT79 )                  | 263.79       | siCTL                | 0.1               | KRT79     | unknown             | other                  |
| P08779     | Keratin, type I cytoskeletal 16 (KRT16)                    | 352.26       | siCTL                | 0.1               | KRT16     | Cytoplasm           | other                  |
| P51572     | B-cell receptor-associated protein 31 (BCAP31)             | 206.19       | siCTL                | 0.1               | BCAP31    | Cytoplasm           | transporter            |
| P15153     | Ras-related C3 botulinum toxin substrate 2 (RAC2)          | 162.9        | siCTL                | 0.1               | RAC2      | Cytoplasm           | enzyme                 |
| P19012     | Keratin, type I cytoskeletal 15 (KRT15)                    | 311.39       | siCTL                | 0.1               | KRT15     | Cytoplasm           | other                  |
| P61916     | Epididymal secretory protein E1(NPC2 )                     | 157.64       | siCTL                | 0.1               | NPC2      | Extracellular Space | other                  |
| P16144     | Integrin beta-4 (ITGB4)                                    | 775.97       | siCTL                | 0.1               | ITGB4     | Plasma Membrane     | transmembrane receptor |
| P08670     | Vimentin (VIM )                                            | 444.93       | siCTL                | 0.1               | VIM       | Cytoplasm           | other                  |
| P53634     | Dipeptidyl peptidase 1(CTSC)                               | 152.78       | siCTL                | 0.1               | CTSC      | Cytoplasm           | peptidase              |
| O95678     | Keratin, type II cytoskeletal 75 (KRT75)                   | 351.29       | siCTL                | 0.1               | KRT75     | Cytoplasm           | other                  |
| P22626     | Heterogeneous nuclear ribonucleoproteins A2/B1 (HNRNPA2B1) | 237.57       | siCTL                | 0.1               | HNRNPA2B1 | Nucleus             | other                  |
| P08648     | Integrin alpha-5 (ITGA5)                                   | 302.16       | siCTL                | 0.1               | ITGA5     | Plasma Membrane     | other                  |
| Q8N1N4     | Keratin, type II cytoskeletal 78 (KRT78)                   | 257.35       | siCTL                | 0.1               | KRT78     | unknown             | other                  |
| P62857     | 40S ribosomal protein S28 (RPS28)                          | 161.87       | siCTL                | 0.1               | RPS28     | Cytoplasm           | other                  |

|        |                                                                   |         |       |      |          |                     |                         |
|--------|-------------------------------------------------------------------|---------|-------|------|----------|---------------------|-------------------------|
| P05787 | Keratin, type II cytoskeletal 8 (KRT8)                            | 311.84  | siCTL | 0.1  | KRT8     | Cytoplasm           | other                   |
| P13647 | Keratin, type II cytoskeletal 5 (KRT5)                            | 441.45  | siCTL | 0.1  | KRT5     | Cytoplasm           | other                   |
| Q07065 | Cytoskeleton-associated protein 4 (CKAP4)                         | 412.42  | siCTL | 0.1  | CKAP4    | Cytoplasm           | other                   |
| P00505 | Aspartate aminotransferase, mitochondrial (GOT2)                  | 280.07  | siCTL | 0.1  | GOT2     | Cytoplasm           | enzyme                  |
| P23229 | Integrin alpha-6 (ITGA6)                                          | 529.79  | siCTL | 0.1  | ITGA6    | Plasma Membrane     | other                   |
| P14314 | Glucosidase 2 subunit beta (PRKCSH)                               | 510.81  | siCTL | 0.1  | PRKCSH   | Cytoplasm           | enzyme                  |
| P07919 | Cytochrome b-c1 complex subunit 6, mitochondrial (UQCRH)          | 154.22  | siCTL | 0.1  | UQCRH    | Cytoplasm           | enzyme                  |
| P31949 | Protein S100-A11 (S100A11)                                        | 516.82  |       | 0.37 | S100A11  | Cytoplasm           | other                   |
| P35908 | Keratin, type II cytoskeletal 2 epidermal (KRT2)                  | 316.85  |       | 0.46 | KRT2     | Cytoplasm           | other                   |
| P61769 | Beta-2-microglobulin (B2M)                                        | 556.9   |       | 0.46 | B2M      | Plasma Membrane     | transmembrane receptor  |
| P04179 | Superoxide dismutase [Mn], mitochondrial (SOD2)                   | 341.11  |       | 0.49 | SOD2     | Cytoplasm           | enzyme                  |
| P61604 | 10 kDa heat shock protein, mitochondrial (HSPE1)                  | 529.12  |       | 0.49 | HSPE1    | Cytoplasm           | enzyme                  |
| P02538 | Keratin, type II cytoskeletal 6A (KRT6A)                          | 389.85  |       | 0.52 | KRT6A    | Plasma Membrane     | other                   |
| Q01546 | Keratin, type II cytoskeletal 2 oral (KRT76)                      | 300.82  |       | 0.52 | KRT76    | Cytoplasm           | other                   |
| Q8NBS9 | Thioredoxin domain-containing protein 5 (TXNDC5)                  | 275.85  |       | 0.55 | TXNDC5   | Cytoplasm           | enzyme                  |
| P19338 | Nucleolin (NCL)                                                   | 499.84  |       | 0.57 | NCL      | Nucleus             | other                   |
| Q9HCY8 | Protein S100-A14 (S100A14)                                        | 318.36  |       | 0.57 | S100A14  | Cytoplasm           | other                   |
| P30101 | Protein disulfide-isomerase A3 (PDIA3)                            | 811.84  |       | 0.59 | PDIA3    | Cytoplasm           | peptidase               |
| P01891 | HLA class I histocompatibility antigen, A-68 alpha chain (HLA-A)  | 430.54  |       | 0.61 | HLA-A    | Plasma Membrane     | transmembrane receptor  |
| P08729 | Keratin, type II cytoskeletal 7 ((KRT7)                           | 537.74  |       | 0.62 | KRT7     | Cytoplasm           | other                   |
| Q07000 | HLA class I histocompatibility antigen, Cw-15 alpha chain (HLA-C) | 466.26  |       | 0.67 | HLA-A*   | Plasma Membrane     | transmembrane receptor  |
| Q08380 | Galectin-3-binding protein (LGALS3BP)                             | 278.86  |       | 0.68 | LGALS3BP | Plasma Membrane     | other                   |
| P13987 | CD59 glycoprotein (CD59)                                          | 186.8   |       | 0.68 | CD59     | Cytoplasm           | transcription regulator |
| P27797 | Calreticulin (CALR)                                               | 749.28  |       | 0.68 | CALR     | Extracellular Space | other                   |
| P09382 | Galectin-1 (LGALS1)                                               | 473.76  |       | 0.69 | LGALS1   | Plasma Membrane     | transmembrane receptor  |
| P05556 | Integrin beta-1 (ITGB1)                                           | 625.91  |       | 0.7  | ITGB1    | Cytoplasm           | enzyme                  |
| P07237 | Protein disulfide-isomerase (P4HB)                                | 688.06  |       | 0.7  | P4HB     | Plasma Membrane     | transmembrane receptor  |
| P16188 | HLA class I histocompatibility antigen, A-30 alpha chain (HLA-A)  | 510.89  |       | 0.71 | HLA-A    | Cytoplasm           | enzyme                  |
| P13667 | Protein disulfide-isomerase A4 (PDIA4)                            | 510.8   |       | 0.72 | PDIA4    | Cytoplasm           | other                   |
| Q04837 | Single-stranded DNA-binding protein, mitochondrial (SSBP1)        | 229.67  |       | 0.73 | SSBP1    | Cytoplasm           | other                   |
| P38646 | Stress-70 protein, mitochondrial (HSPA9)                          | 1440.29 |       | 0.73 | HSPA9    | Cytoplasm           | enzyme                  |
| P31930 | Cytochrome b-c1 complex subunit 1, mitochondrial (UQCRC1)         | 406.49  |       | 0.73 | UQCRC1   | Cytoplasm           | other                   |

|        |                                                                         |         |               |      |           |                 |                         |
|--------|-------------------------------------------------------------------------|---------|---------------|------|-----------|-----------------|-------------------------|
| P63261 | Actin, cytoplasmic 2 (ACTG1)                                            | 1412.46 |               | 1.36 | ACTG1     | Cytoplasm       | transcription regulator |
| P06733 | Alpha-enolase (ENO1)                                                    | 352.24  |               | 1.39 | ENO1      | Cytoplasm       | other                   |
| P04350 | Tubulin beta-4 chain (TUBB4)                                            | 253.7   |               | 1.42 | TUBB4     | Nucleus         | other                   |
| Q96FQ6 | Protein S100-A16 (S100A16)                                              | 220.28  |               | 1.55 | S100A16   | Cytoplasm       | other                   |
| P07437 | Tubulin beta chain (TUBB)                                               | 360.55  |               | 1.63 | TUBB      | Cytoplasm       | transporter             |
| P06576 | ATP synthase subunit beta, mitochondrial (ATP5B)                        | 1149.16 |               | 1.7  | ATP5B     | Cytoplasm       | transporter             |
| P62158 | Calmodulin (CALM1)                                                      | 120.12  |               | 1.79 | CALM1     | Cytoplasm       |                         |
| P35232 | Prohibitin (PHB)                                                        | 254.63  | siCTL+<br>Adr | 10   | PHB       | Nucleus         | transcription regulator |
| P08865 | 40S ribosomal protein SA (RPSA)                                         | 224.18  | siCTL+<br>Adr | 10   | RPSA      | Cytoplasm       | translation regulator   |
| Q99623 | Prohibitin-2 (PHB2)                                                     | 260.54  | siCTL+<br>Adr | 10   | PHB2      | Cytoplasm       | transcription regulator |
| P12814 | Alpha-actinin-1 (ACTN1)                                                 | 772.81  | siCTL+<br>Adr | 10   | ACTN1     | Cytoplasm       | other                   |
| Q9H4B7 | Tubulin beta-1 chain (TUBB1)                                            | 195.91  | siCTL+<br>Adr | 10   | TUBB1     | Cytoplasm       | other                   |
| P54709 | Sodium/potassium-transporting ATPase subunit beta-3 (ATP1B3)            | 97.4    | siCTL+<br>Adr | 10   | ATP1B3    | Plasma Membrane | transporter             |
| Q14697 | Neutral alpha-glucosidase AB (GANAB)                                    | 392.52  | siCTL+<br>Adr | 10   | GANAB     | Cytoplasm       | enzyme                  |
| O43707 | Alpha-actinin-4 (ACTN4)                                                 | 825.22  | siCTL+<br>Adr | 10   | ACTN4     | Cytoplasm       | other                   |
| P62879 | Guanine nucleotide-binding protein G(I)/G(S)/G(T) subunit beta-2 (GNB2) | 231.89  | siCTL+<br>Adr | 10   | GNB2      | Plasma Membrane | enzyme                  |
| Q5VTE0 | Putative elongation factor 1-alpha-like 3 (EEF1A1P5)                    | 266.91  | siCTL+<br>Adr | 10   | EEF1A1P5* | unknown         | other                   |
| P30048 | Thioredoxin-dependent peroxide reductase, mitochondrial (PRDX3)         | 222.11  | siCTL+<br>Adr | 10   | PRDX3     | Cytoplasm       | enzyme                  |
| P61026 | Ras-related protein Rab-10 (RAB10)                                      | 167.35  | siCTL+<br>Adr | 10   | RAB10     | Cytoplasm       | enzyme                  |
| P17066 | Heat shock 70 kDa protein 6 (HSPA6)                                     | 392.44  | siCTL+<br>Adr | 10   | HSPA6     | unknown         | other                   |
| P04264 | Keratin, type II cytoskeletal 1 (KRT1)                                  | 314.23  | siCTL+<br>Adr | 10   | KRT1      | Cytoplasm       | other                   |



**Supplementary Table 5. IPA analysis**

| Comparison                     | Network ID | Molecules in Network                                                                                                                                                                                                                                              | Score | Focus Molecules | Associated Network Functions                                             |
|--------------------------------|------------|-------------------------------------------------------------------------------------------------------------------------------------------------------------------------------------------------------------------------------------------------------------------|-------|-----------------|--------------------------------------------------------------------------|
| <b>siMDM4 vs siCTL</b>         |            |                                                                                                                                                                                                                                                                   |       |                 |                                                                          |
|                                | 1          | BAD,CANX,CCNL2,E2F1,EIF2S1,GNB1,HADH B,IgG,ITGA5,KRT14,KRT15,KRT16,KRT18,LAMB3,Lh,MLL2,NXF1,PDIA3,PLAU,PPP2R2B,PRDM1,PRKD1,SLC3A2,SNAP23,SP1,SRSF3,SRSF7,TAP1,TAP2,TAPBP,TNF, <b>TP53</b> ,TUBB,VIM,ZNF148                                                        | 23    | 13              | Cellular Development, Cellular Growth and Proliferation, Gene Expression |
|                                | 2          | ACTN4,AGTR1,APEX1,CCNC,CCT2,CCT3,CCT4,CCT5,CCT7,CCT8,CCT6A,CDK8,CDK19,CDKN1A,CTNNA1,CTNNB1,EEF1A1,GCN1L1,HGF,HNRNPA2B1,HNRNPF,INA,KRT18,KRT19,MED12,MED13,MYC,PLAU,PPIA,RPSA,S100A11,SERPINF1,SHMT2,TCP1,TNPO1                                                    | 19    | 11              | Cell Death, Cell Cycle, Cancer                                           |
| <b>siMDM4+Adr vs siCTL+Adr</b> |            |                                                                                                                                                                                                                                                                   |       |                 |                                                                          |
|                                | 1          | ANXA1, ATP1B3, B2M, BSG, CALR, CANX, ERK, ERK1/2, HLA-A, HLA-B27, HSPD1, IgG, ITGA3, ITGB1, ITGB4, LAMC2, Laminin, LAMP1, LGALS1, LGALS3, LGALS3BP, MHC Class I (complex), NCL, NFkB (complex), NPM1, PDIA3, PI3K (complex), RNA                                  | 44    | 23              | Cell-To-Cell Signaling and Interaction, Cell Death, Tissue Development   |
|                                | 2          | ACTG1, BMI1, CTNNB1, CXCL12, DDX39A, E2F4, HNRNPA1, HNRNPC, HNRNPK, HSP90B1, ITGB4, KRT5, LGALS3, MYCN, NCL, P4HB, PABPC1, PABPN1, PHB2, PHB, PPP2CA, PRKCSH, RBL1, RBL2, SARNP, SATB1, SSBP1, TCF7L2, THOC2, THOC4, Thymidine Kinase, <b>TP53</b> , TPI1, YWHAG, | 22    | 14              | Cancer, Gene Expression, Cell Death                                      |
|                                | 3          | 26s Proteasome, Actin, BTRC, CD59, ENO1, EP300, ESR1, ESRRA, EZR, FOXP3, FUBP1, HNRNPU, HSPE1, Jnk, KRT8, KRT19, LAMC2, Lamin b, MDH2, MSN, MYB, PLEC, POSTN, PPP2CA, PPP2R1A, RAC2, SERPINA1, SNAI2, SRC, TGFA, TGFB1, TNF, TNFSF11, VIM, WISP2                  | 16    | 11              | Cellular Movement, Cancer, Dermatological Diseases and Conditions        |

The score associated to each network indicates the degree of relevance of a network to the molecules of the input dataset and takes into account the number of Network Eligible Genes and the size of the network. Only a score value >15 was considered. Fischer's exact test was used to evaluate the probability that each biological function assigned to that network is due to a random event.

**Supplementary Table 6. IPA Protein Function Profiles**

| <b>siMDM4 vs siCTL</b>            |                                           |                |                                                                                                                                                |                    |
|-----------------------------------|-------------------------------------------|----------------|------------------------------------------------------------------------------------------------------------------------------------------------|--------------------|
| <u>Category</u>                   | <u>Functions Annotation</u>               | <u>p-Value</u> | <u>Molecules</u>                                                                                                                               | <u># Molecules</u> |
| Cellular Growth and Proliferation | growth of cells                           | 1,12E-04       | ACTN4, ANXA1, BCAP31, CCT3, HADHB, HNRNPF, ITGA5, RPSA, S100A11, SERPINH1, SLC3A2, SOD2                                                        | 12                 |
|                                   | growth of tumor cells                     | 4,60E-03       | ACTN4, ITGA5, SLC3A2                                                                                                                           | 3                  |
|                                   | proliferation of breast cancer cell lines | 1,13E-02       | EEF1A1, ITGA5, SOD2                                                                                                                            | 3                  |
|                                   | colony formation of tumor cell lines      | 1,41E-02       | ANXA1, HNRNPA2B1, SOD2                                                                                                                         | 3                  |
|                                   | size of breast cancer cell lines          | 1,44E-02       | ITGA5                                                                                                                                          | 1                  |
|                                   | colony formation of embryonic cell lines  | 1,68E-02       | SOD2                                                                                                                                           | 1                  |
|                                   | colony formation of epithelial cell lines | 2,15E-02       | SOD2                                                                                                                                           | 1                  |
|                                   | proliferation of carcinoma cell lines     | 3,18E-02       | ANXA1, HNRNPA2B1                                                                                                                               | 2                  |
|                                   | growth of tumor cell lines                | 3,43E-02       | ACTN4, ANXA1, ITGA5, SLC3A2, SOD2                                                                                                              | 5                  |
|                                   | proliferation of tumor cell lines         | 4,58E-02       | ANXA1, EEF1A1, HNRNPA2B1, ITGA5, SOD2                                                                                                          | 5                  |
|                                   |                                           |                |                                                                                                                                                |                    |
| <b>siMDM4+Adr vs siCTL+Adr</b>    |                                           |                |                                                                                                                                                |                    |
| <u>Category</u>                   | <u>Functions Annotation</u>               | <u>p-Value</u> | <u>Molecules</u>                                                                                                                               | <u># Molecules</u> |
| Cell Death                        | apoptosis of tumor cell lines             | 1.53E-07       | B2M, CALR, CD59, FUBP1, HNRNPA1, HSPD1, ITGB1, ITGB4, LGALS1, LGALS3, LGALS3BP, MSN, NCL, NPM1, P4HB, PHB, S100A11, SOD2                       | 18                 |
|                                   | cell death of tumor cell lines            | 2.83E-07       | B2M, CALR, CD59, FUBP1, HNRNPA1, HSPD1, ITGB1, ITGB4, LAMP1, LGALS1, LGALS3, LGALS3BP, MSN, NCL, NPM1, P4HB, PHB, S100A11, SOD2                | 19                 |
|                                   | cell death of cancer cells                | 3.27E-07       | B2M, CALR, CD59, ENO1, FUBP1, HNRNPA1, HSP90B1, HSPD1, ITGB1, ITGB4, LAMP1, LGALS1, LGALS3, LGALS3BP, MSN, NCL, NPM1, P4HB, PHB, S100A11, SOD2 | 21                 |
|                                   | apoptosis of breast cancer cell lines     | 5.90E-05       | B2M, HSPD1, ITGB1, ITGB4, LGALS3, PHB, SOD2                                                                                                    | 7                  |
|                                   | activation-induced cell death             | 1.30E-04       | CD59, ITGB1, RAC2                                                                                                                              | 3                  |
|                                   | cytolysis of tumor cell lines             | 1.72E-03       | B2M, CD59                                                                                                                                      | 2                  |
|                                   | killing of cells                          | 1.97E-03       | ITGB1, LGALS1, LGALS3                                                                                                                          | 3                  |
|                                   | apoptosis of carcinoma cells              | 2.22E-03       | ENO1, ITGB4                                                                                                                                    | 2                  |
|                                   | inhibition of apoptosis                   | 3.73E-03       | ANXA1, HSP90B1, HSPA9, TXNDC5                                                                                                                  | 4                  |
|                                   | apoptosis of breast cell lines            | 5.99E-03       | ITGB1, NPM1                                                                                                                                    | 2                  |
|                                   | cell death of epithelial cell lines       | 1.07E-02       | DLST, HSPD1, ITGB1, PRDX3                                                                                                                      | 4                  |
|                                   | apoptosis of cancer cells                 | 1.07E-02       | ENO1, ITGB4, LGALS1                                                                                                                            | 3                  |
|                                   | cell death of organ                       | 1.20E-02       | DLST, ITGB1, LGALS1, PRDX3, SOD2                                                                                                               | 5                  |
|                                   | apoptosis of organ                        | 1.21E-02       | ITGB1, LGALS1, SOD2                                                                                                                            | 3                  |
|                                   | toxicity of cells                         | 1.24E-02       | CD59                                                                                                                                           | 1                  |
|                                   | anoikis                                   | 1.90E-02       | ITGB1, LGALS3                                                                                                                                  | 2                  |
|                                   | cell viability of tumor cell lines        | 2.40E-02       | HSP90B1, P4HB, SOD2                                                                                                                            | 3                  |
|                                   | apoptosis of epithelial cell lines        | 2.53E-02       | HSPD1, ITGB1, PRDX3                                                                                                                            | 3                  |
|                                   | anoikis of breast cancer cell lines       | 3.68E-02       | LGALS3                                                                                                                                         | 1                  |
|                                   | survival of breast cancer cell lines      | 3.69E-02       | LGALS3, SOD2                                                                                                                                   | 2                  |
